# Supplementary material for: A positive feedback loop involving the Wnt/β-catenin/MYC/Sox2 axis defines a highly tumorigenic cell subpopulation in ALK-positive anaplastic large cell lymphoma
Source: PubMed Central journal article supplement (PMC5100098; doi:10.1186/s13045-016-0349-z), 2016-11-08

**Fig.3****a**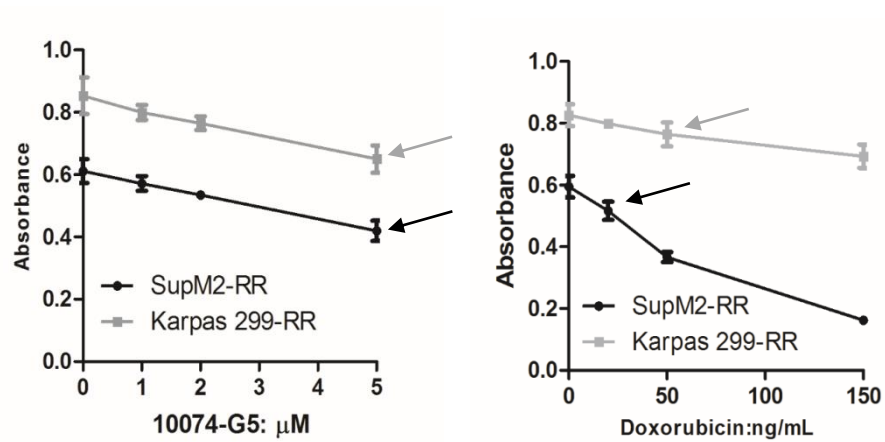**b**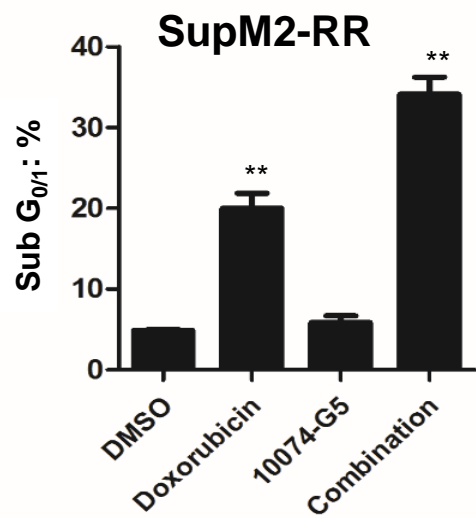**c**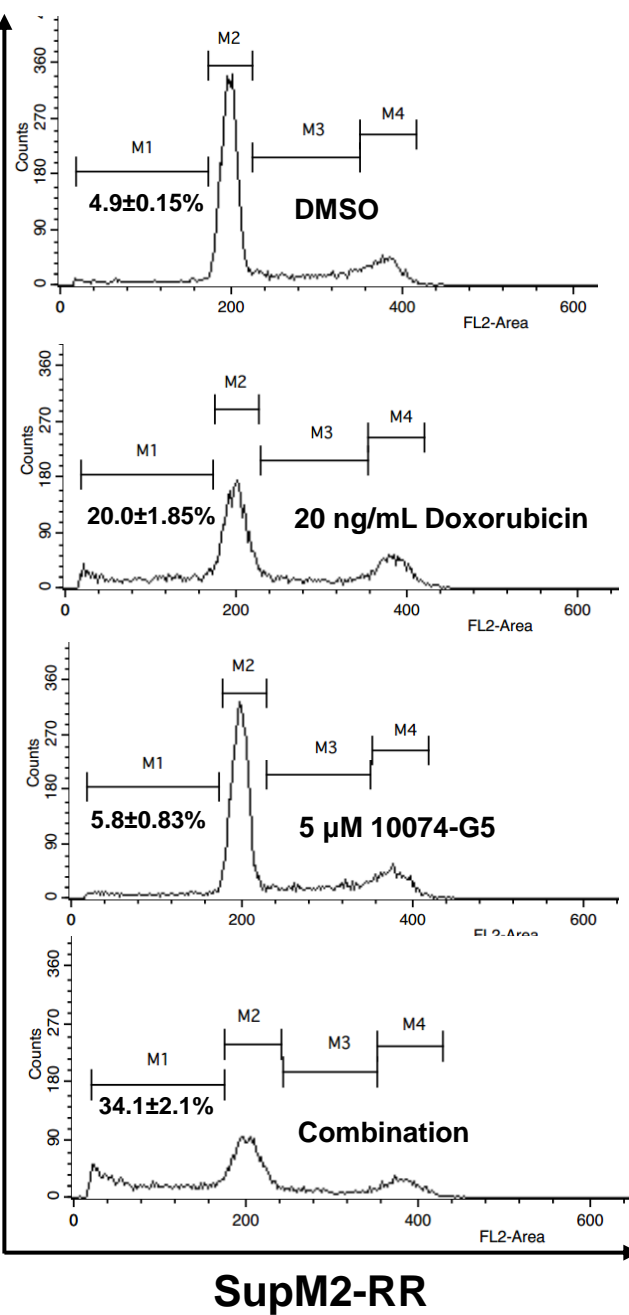

**Fig.3**

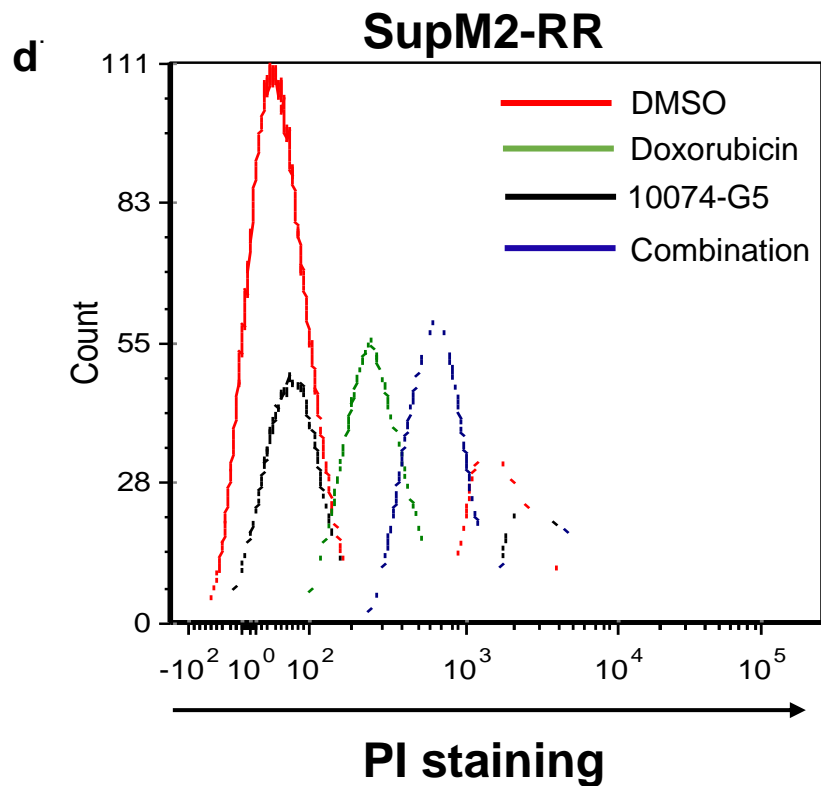

**e**

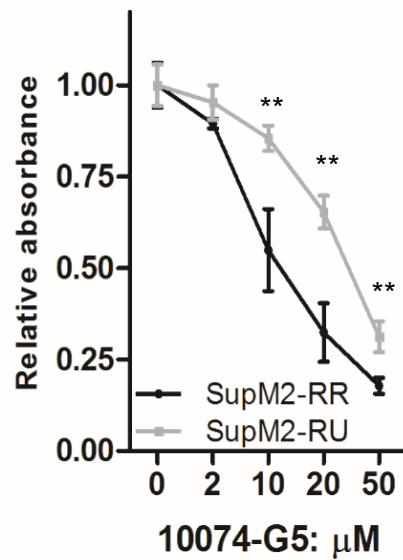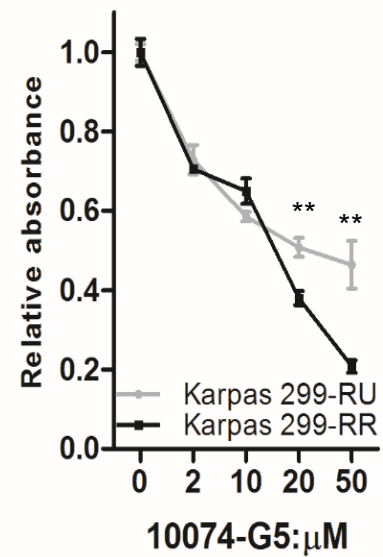

Supplement: 13045_2016_349_MOESM4_ESM.pdf [file 13045_2016_349_MOESM4_ESM.pdf]
