# Supplementary material for: A positive feedback loop involving the Wnt/β-catenin/MYC/Sox2 axis defines a highly tumorigenic cell subpopulation in ALK-positive anaplastic large cell lymphoma
Source: Springer Nature journal article supplement (doi:10.1186/s13045-016-0349-z), 2016-11-08

**Fig.2**

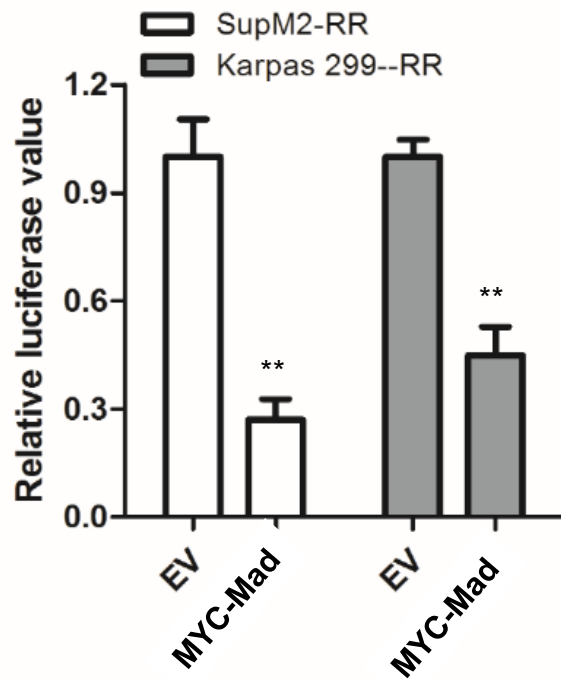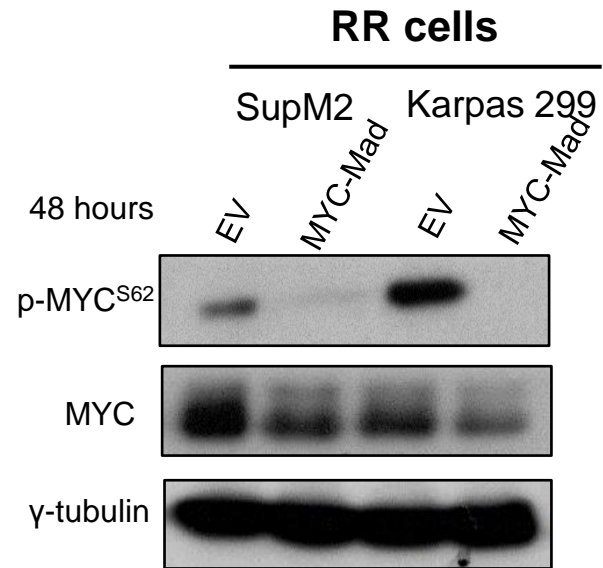

Supplement: MOESM3 [file 11029288]
